# Supplementary material
Source: HighWire-hosted journal article supplement (https://ez-admanager.com/highwire/filestream/135275/field_highwire_adjunct_files/0/zwaluw_2158.pdf)
Supplement: zwaluw_2158.pdf [file zwaluw_2158.pdf]

# 2년간의 비타민 B 치료가 인지 수행력에 미치는 영향

## RCT의 이차 자료

Results of 2-year vitamin B treatment on cognitive performance  
Secondary data from an RCT

Nikita L. van der Zwaluw,  
PhD

Rosalie A.M. Dhonukshe-  
Rutten, PhD

Janneke P. van  
Wijngaarden, PhD

Elske M. Brouwer-  
Brolsma, PhD

Ondine van de Rest, PhD  
Paulette H. In 't Veld,

MSc  
Anke W. Enneman, MSc  
Suzanne C. van Dijk, MD

Annelies C. Ham, MSc  
Karin M.A. Swart, MSc

Nathalie van der Velde,  
PhD

Natasja M. van Schoor,  
PhD

Tischa J.M. van der  
Cammen, PhD

André G. Uitterlinden,  
PhD

Paul Lips, MD, PhD  
Roy P.C. Kessels, PhD

Lisette C.P.G.M. de  
Groot, PhD

**목적:** 호모시스테인(homocystein, Hcy)이 상승되어 있는 노인에서 엽산과 비타민 B12 보충이 인지 수행력에 미치는 영향이 있는지 2년간 연구하였다.

**방법:** 이 연구는 다기관, 이중맹검, 무작위배정, 환자-대조군 연구로 Hcy 수치가 12에서 50  $\mu\text{mol/L}$ 인 2,919명의 노인(65세 이상)을 대상으로 하였다. 참가자들은 400  $\mu\text{g}$  엽산과 500  $\mu\text{g}$  비타민 B12(비타민 B군)가 모두 포함된 약이나 위약을 복용하였다. 두 약은 모두 15  $\mu\text{g}$ 의 비타민 D3가 포함되었다. 전반적인 인지기능은 Mini-Mental State Examination ( $n=2,556$ ), 삽화 기억 ( $n=2,467$ ), 주의집중력과 작업기억( $n=759$ ), 정보처리속도( $n=731$ ), 집행기능( $n=721$ )으로 평가하였다.

**결과:** 평균 연령은 74.1세(SD 6.5)이었다. Hcy 농도는 비타민 B군에서 5.0  $\mu\text{mol/L}$  감소하였고(95% CI  $-5.3\sim-4.7$   $\mu\text{mol/L}$ ) 위약군에서는 1.3  $\mu\text{mol/L}$  (95% CI  $-1.6\sim-0.9$   $\mu\text{mol/L}$ ) 감소하였다. 공변량분석을 이용한 인지 영역 점수로는 시간에 따른 변화는 관찰할 수 없었다. MMSE 점수는  $t$  검정으로 평가시 비타민 B군에서 0.1 ( $-0.2$ 에서 0.0) 감소하였고 위약그룹에서 0.3 ( $-0.4$ 에서  $-0.2$ ) 감소하였다( $P=0.05$ ).

**결론:** 2년의 엽산과 비타민 B12 보충은 Hcy 수치가 상승되어 있는 노인에서 4개의 인지 영역에 유의한 영향을 주지 않았다. 전반적인 인지기능의 감소를 약간 저하시킬 수는 있지만, 그 차이가 유의하지 않았다.

**근거의 분류:** “호모시스테인이 상승되어 있는 노인에서 엽산과 비타민 B12의 2년 간의 보충이 인지 수행력에 영향을 주지 않는다”는 결론에 대해 Class 의 근거를 제공한다.

Neurology® 2014;83:2158–2166
